# Supplementary material
Source: Springer Nature journal article supplement (https://www.springermedizin.de/resource/supplementary/12865_2011_434_MOESM2_ESM.pdf/9427984)

**A**

Cytokines secretion (pg/ml)

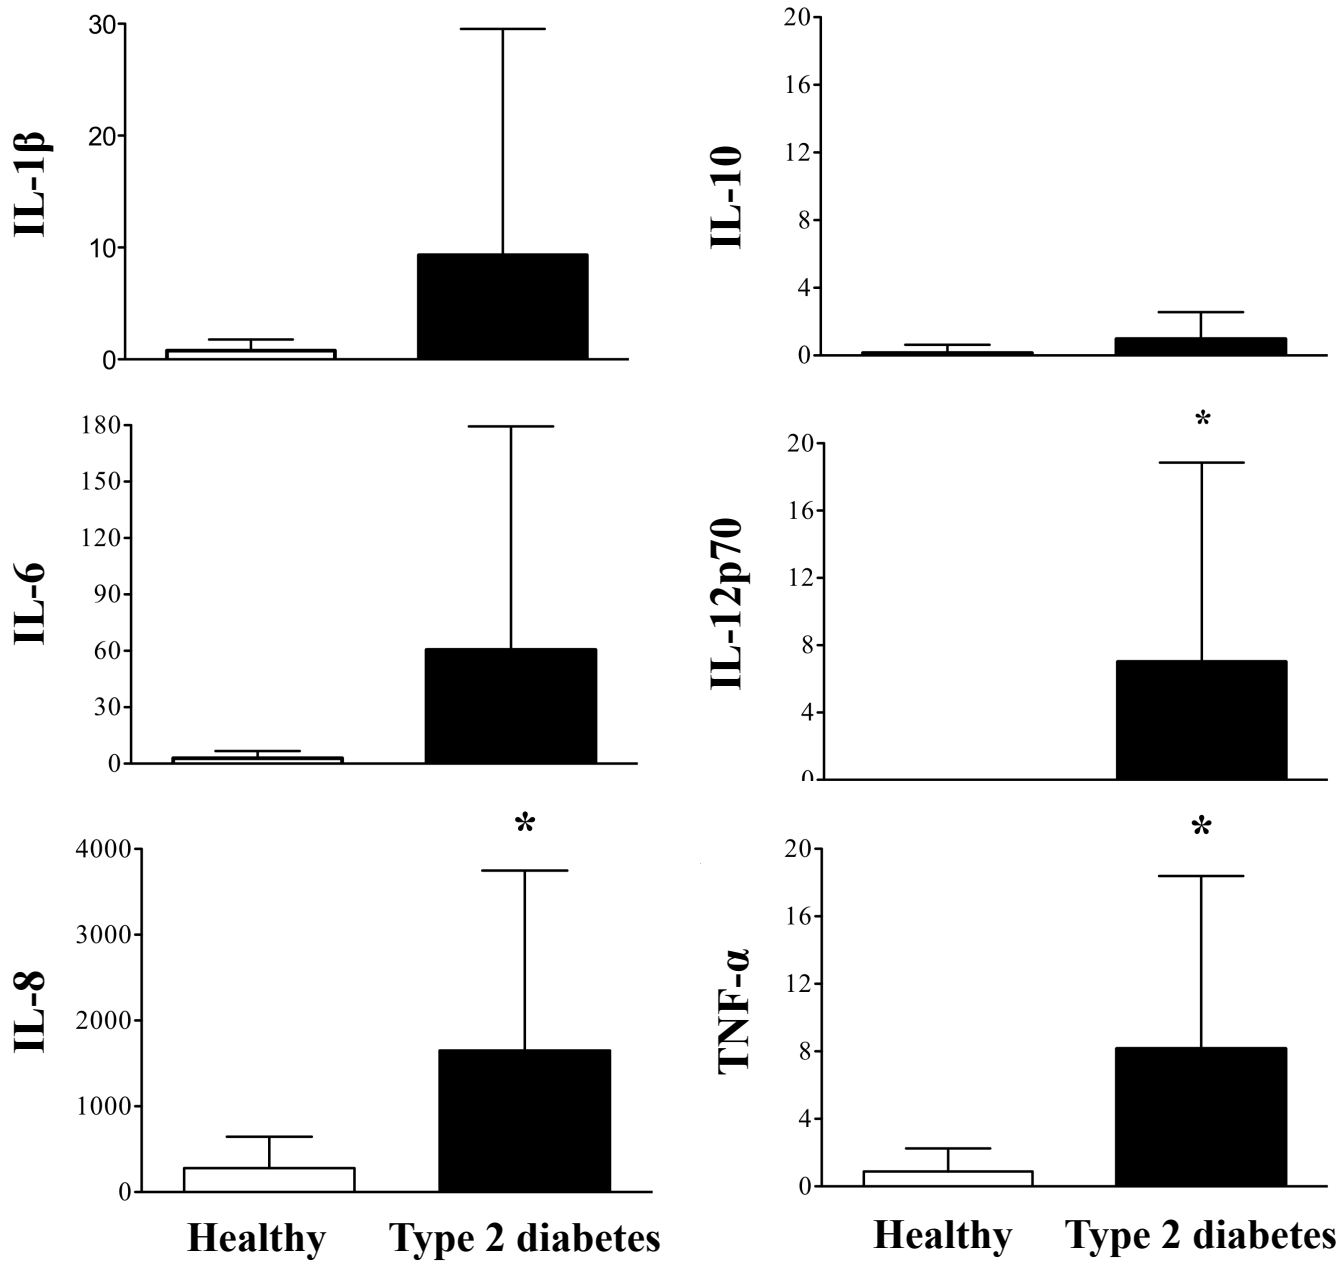**B**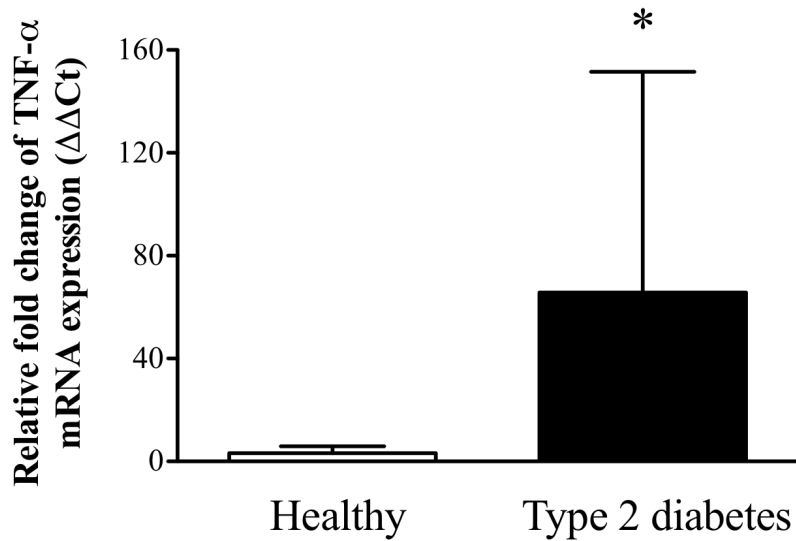

Supplement: MOESM2 [file 9427984]
